# Supplementary figures and images for: Highly Infectious Prions Generated by a Single Round of Microplate-Based Protein Misfolding Cyclic Amplification
Source: PubMed Central journal article supplement — mBio. 2013 Dec 31;5(1):e00829-13. doi: 10.1128/mBio.00829-13 (PMC3884057; doi:10.1128/mbio.00829-13), 2013-12-31

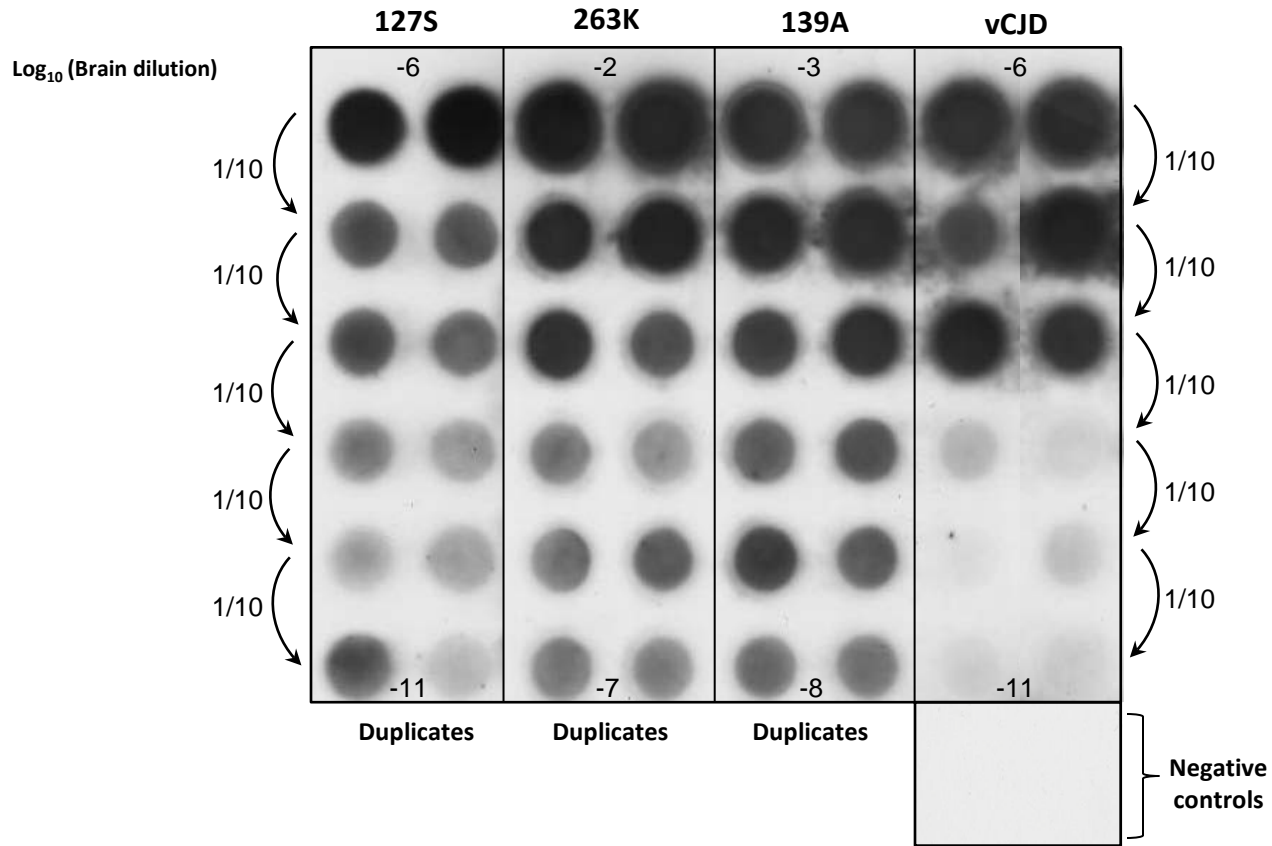

Supplementary Figure S1

Supplement: mbo006131695sf01.pdf [file mbo006131695sf01.pdf]
